# Supplementary material for: Design of size-controlled Au nanoparticles loaded on the surface of ZnO for ethanol detection
Source: Royal Society of Chemistry journal article supplement (doi:10.1039/d0ce01318h), 2020-12-10
Supplement: d0ce01318h1.pdf [file d0ce01318h1.pdf]

**Supplementary Information**  
**Of**  
**Design of size-controlled Au nanoparticles loaded on the surface of**  
**ZnO for ethanol detection**

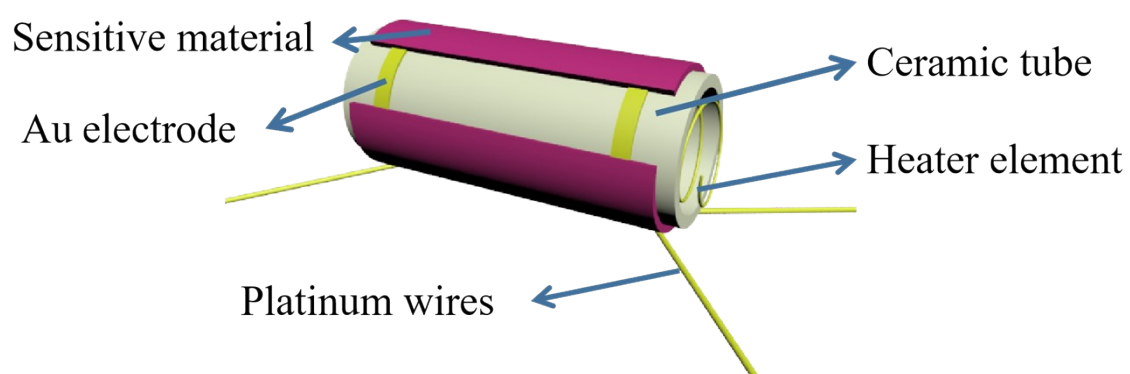

**Fig. S1.** Sensor structure.

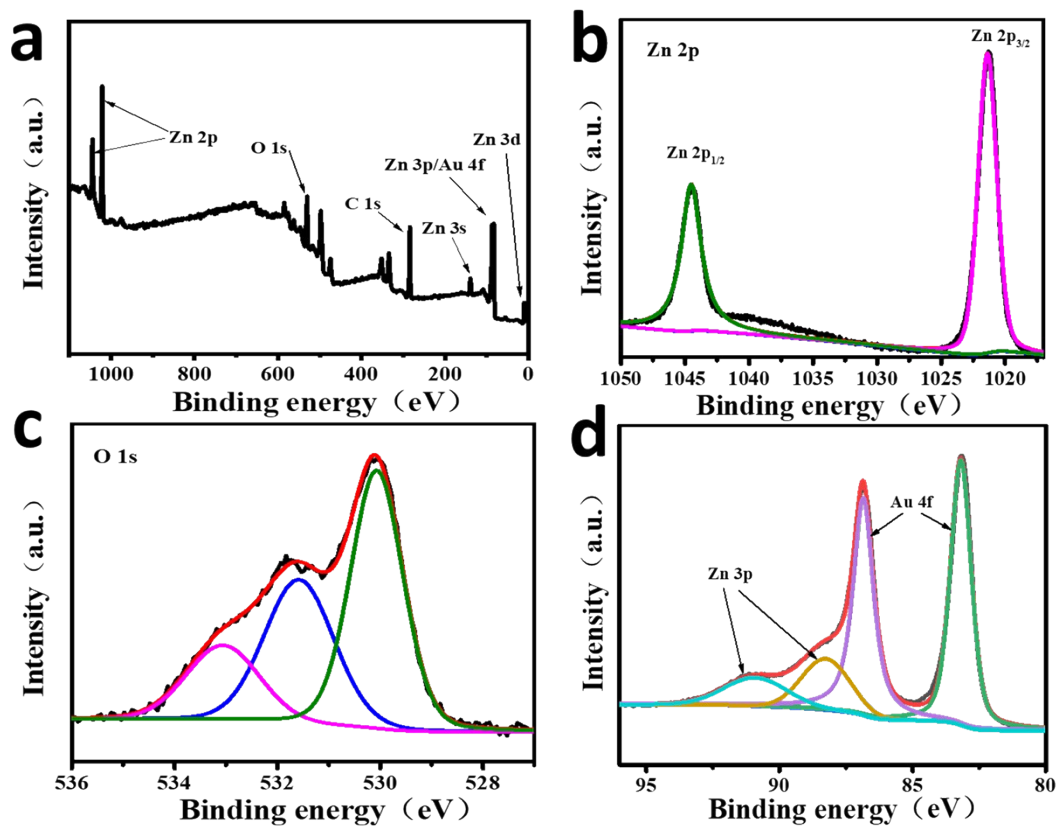

**Fig. S2.** Survey (a), Zn 2p (b), O 1s (c) and Au 4f (d) XPS spectra of ZnO-Au -000 sample.

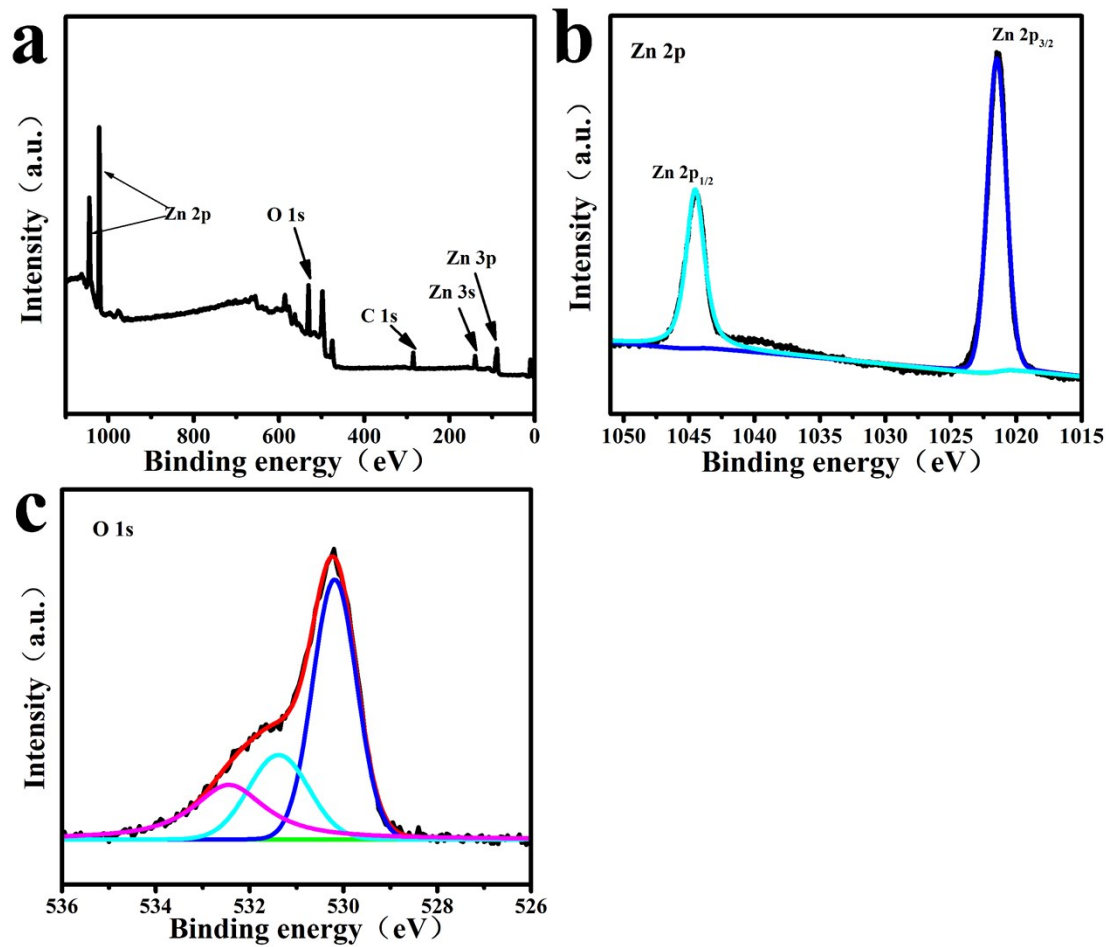

**Fig. S3.** Survey (a), Zn 2p (b) and O 1s (c) XPS spectra of original sample.

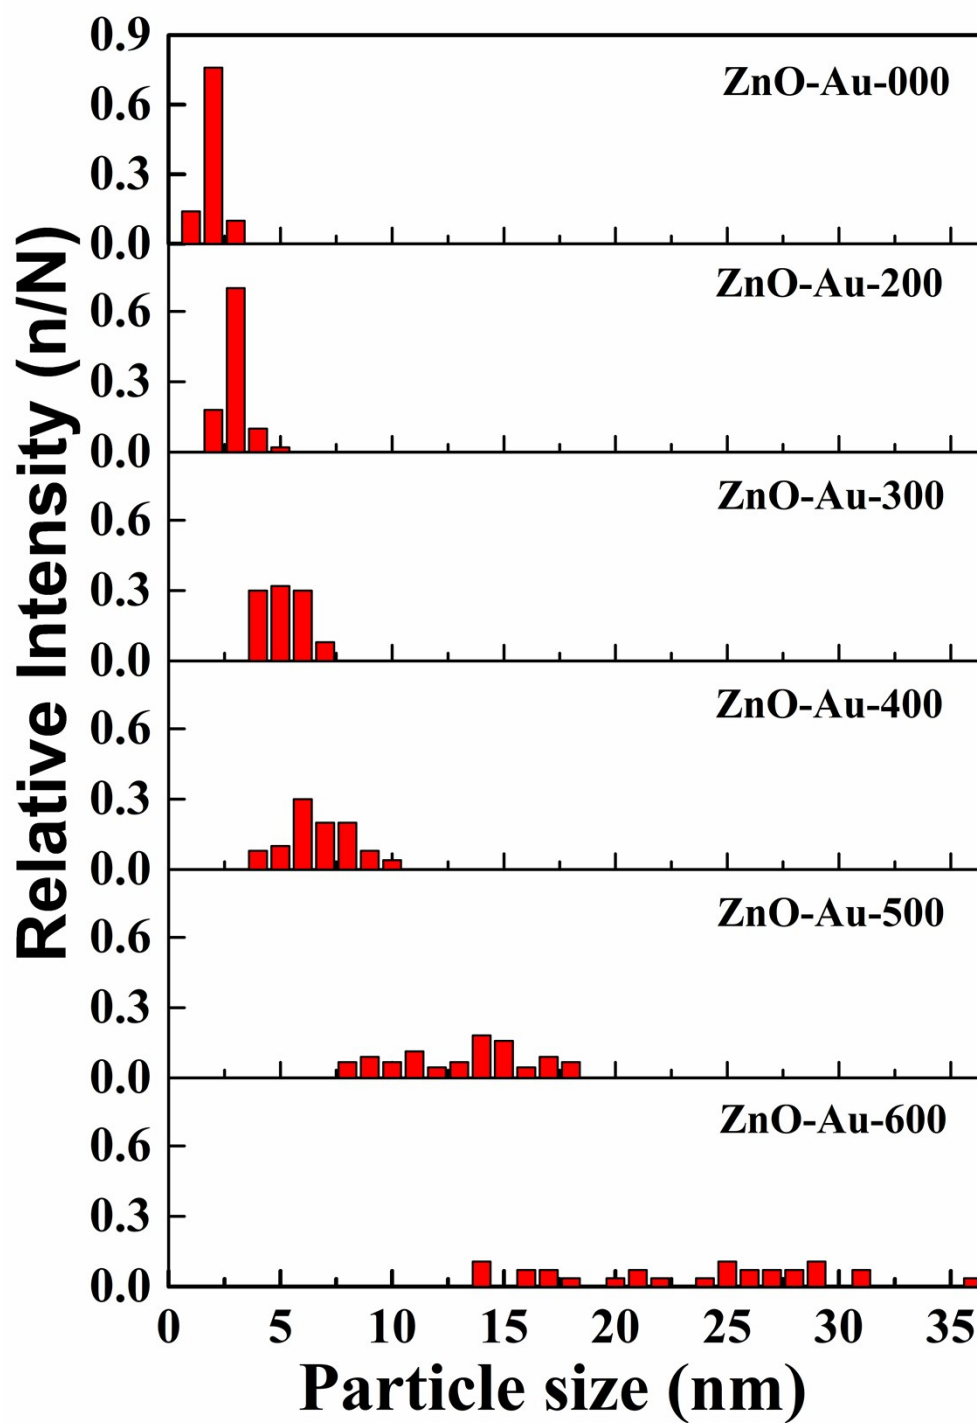

Fig. S4. Au particle size distribution of sample ZnO-Au-000 to ZnO-Au-600.

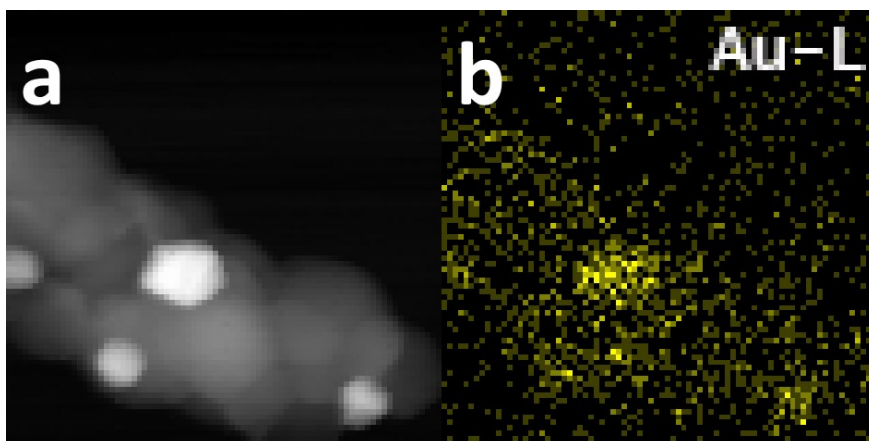

**Fig. S5.** (a) HAADF-STEM image of the sample ZnO-Au-600; (b) corresponding Au elemental maps of the selected area, respectively.

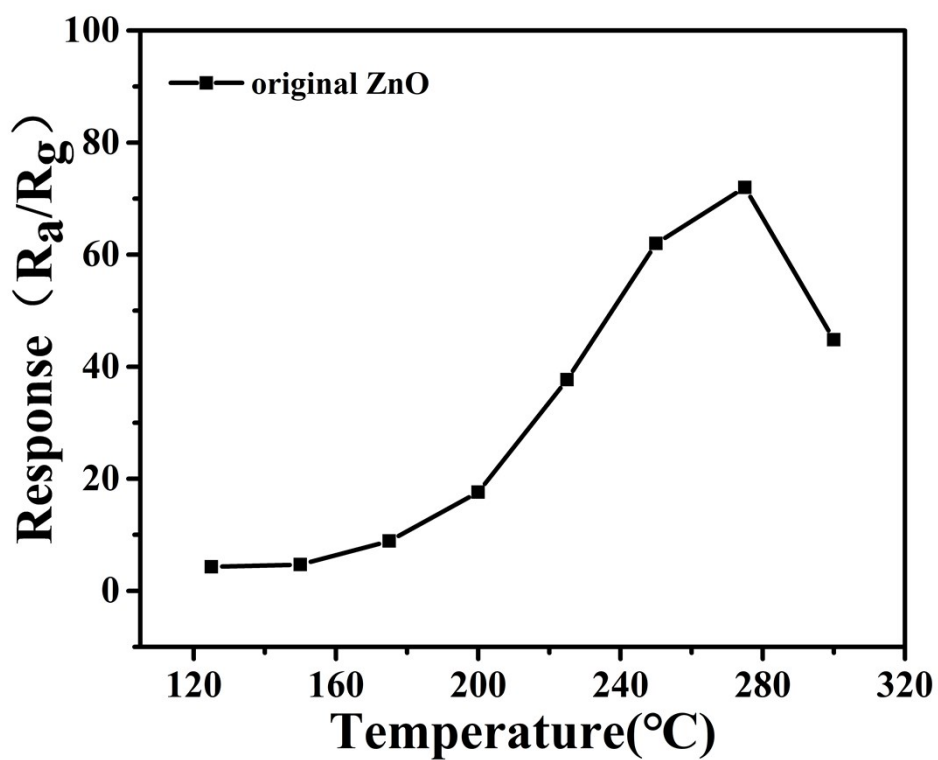

**Fig. S6** Response of pure ZnO NWs sensor to the test temperature in 100 ppm ethanol.

| Sample       | Best Response (50ppm) | Optimum Temperature (°C) |
|--------------|-----------------------|--------------------------|
| original ZnO | 65.1 (100ppm)         | 275°C                    |
| ZnO-Au-000   | 11.9                  | —                        |
| ZnO-Au-200   | 108.2                 | 125°C                    |
| ZnO-Au-300   | 96.1                  | 175°C                    |
| ZnO-Au-400   | 123.2                 | 175°C                    |
| ZnO-Au-500   | 133.3                 | 175°C                    |
| ZnO-Au-600   | 151.8                 | 200°C                    |

**Tab. S1.** The best response value and Optimum Temperature of different sensors in 100 ppm ethanol.

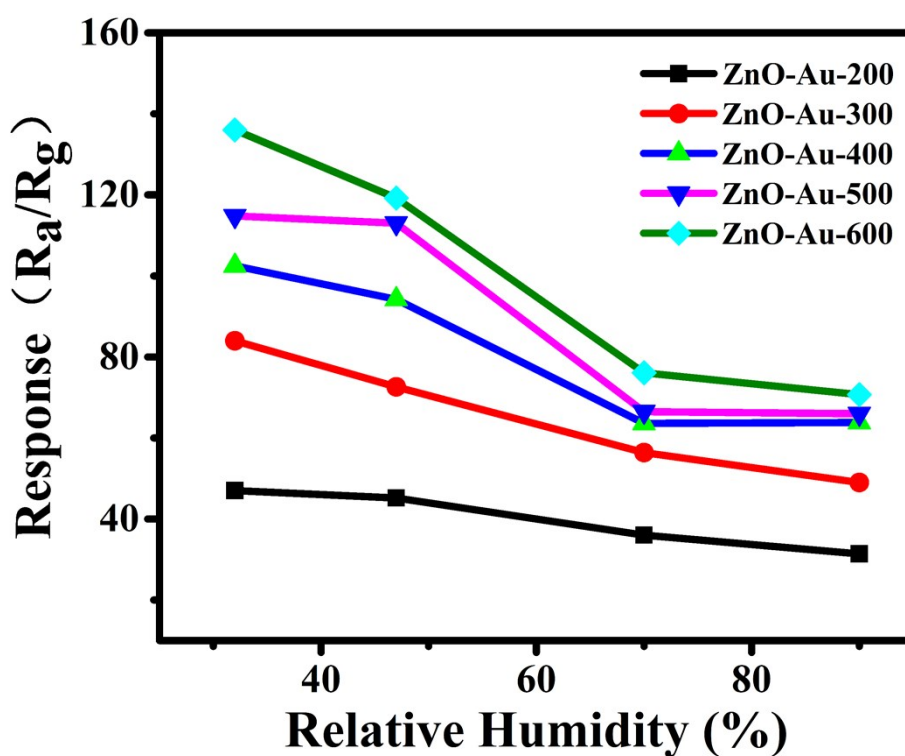

**Fig. S7** Relationship between response and relative humidity at 175 °C in 50ppm ethanol.

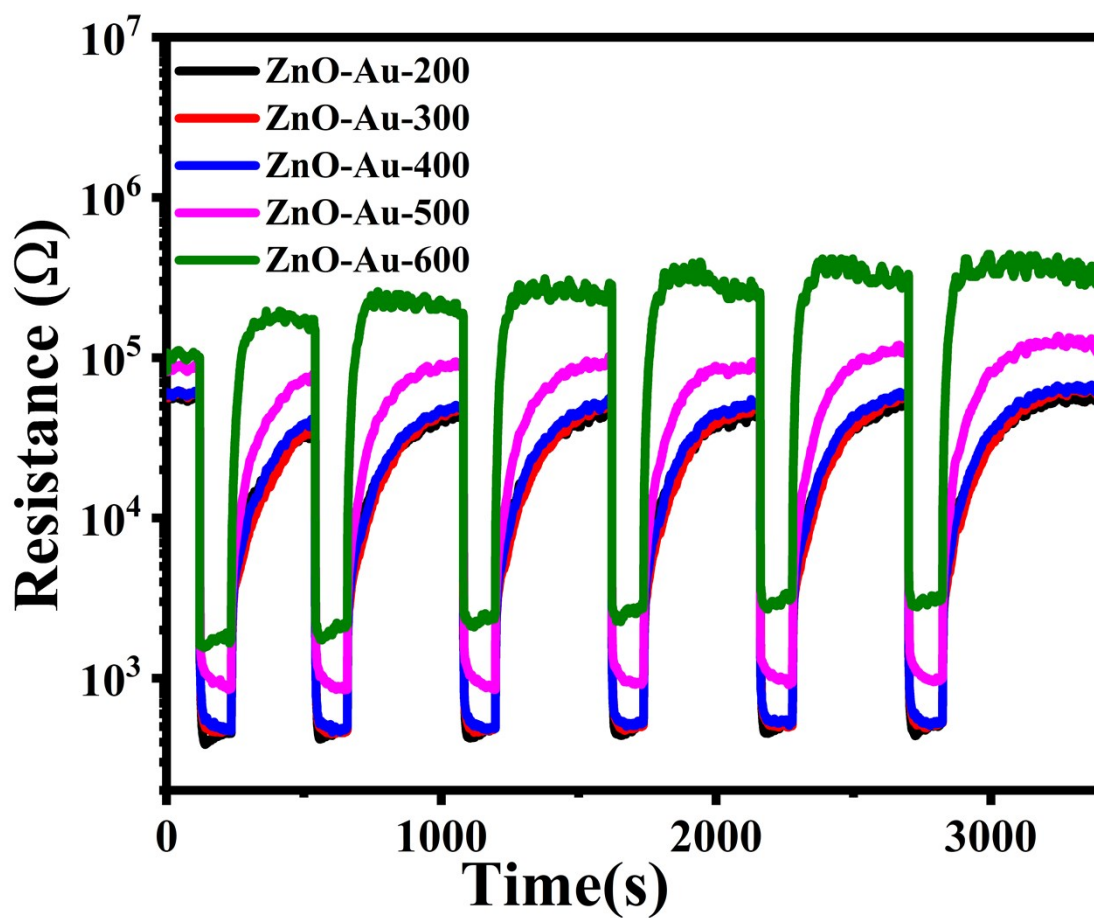

Fig. S8 The resistance reproducibility of ZnO-Au-500 sensor upon 6-cycle tests to 50 ppm ethanol at 175°C.
